# Supplementary material for: New Cembrane-Type Diterpenoids from the South China Sea Soft Coral Sarcophyton ehrenbergi
Source: MDPI journal article supplement (doi:10.3390/molecules21050587), 2016-05-04
Supplement: s1 [file s1]

# Supplementary Materials: New Cembrane-Type Diterpenoids from the South China Sea Soft Coral *Sarcophyton ehrenbergi*

Gui-Hua Tang, Zhang-Hua Sun, Yi-Hong Zou and Sheng Yin

## Contents:

**Figure S1.** The South China Sea soft coral *Sarcophyton ehrenbergi*

**Figure S2.**  $^1\text{H}$ -NMR spectrum of compound 1

**Figure S3.** DEPT spectra of compound 1

**Figure S4.** HSQC spectrum of compound 1

**Figure S5.**  $^1\text{H}$ - $^1\text{H}$  COSY spectrum of compound 1

**Figure S6.** HMBC spectrum of compound 1

**Figure S7.** NOESY spectrum of compound 1

**Figure S8.**  $^1\text{H}$ -NMR spectrum of compound 2

**Figure S9.** DEPT spectra of compound 2

**Figure S10.** HSQC spectrum of compound 2

**Figure S11.**  $^1\text{H}$ - $^1\text{H}$  COSY spectrum of compound 2

**Figure S12.** HMBC spectrum of compound 2

**Figure S13.** NOESY spectrum of compound 2

**Figure S14.**  $^1\text{H}$ -NMR spectrum of compound 3

**Figure S15.** DEPT spectra of compound 3

**Figure S16.** HSQC spectrum of compound 3

**Figure S17.**  $^1\text{H}$ - $^1\text{H}$  COSY spectrum of compound 3

**Figure S18.** HMBC spectrum of compound 3

**Figure S19.** NOESY spectrum of compound 3

**Figure S20.**  $^1\text{H}$ -NMR spectrum of compound 4

**Figure S21.** DEPT spectra of compound 4

**Figure S22.** HSQC spectrum of compound 4

**Figure S23.**  $^1\text{H}$ - $^1\text{H}$  COSY spectrum of compound 4

**Figure S24.** HMBC spectrum of compound 4

**Figure S25.** NOESY spectrum of compound 4

**Figure S26.**  $^1\text{H}$ -NMR spectrum of compound 5

**Figure S27.** DEPT spectra of compound 5

**Figure S28.** HSQC spectrum of compound 5

**Figure S29.**  $^1\text{H}$ - $^1\text{H}$  COSY spectrum of compound 5

**Figure S30.** HMBC spectrum of compound 5

**Figure S31.** NOESY spectrum of compound 5

**Figure S32.**  $^1\text{H}$ -NMR spectrum of compound 6

**Figure S33.** DEPT spectra of compound 6

**Figure S34.**  $^1\text{H}$ -NMR spectrum of compound 7

**Figure S35.** DEPT spectra of compound 7

**Figure S36.**  $^1\text{H}$ -NMR spectrum of compound 8

**Figure S37.** DEPT spectra of compound 8

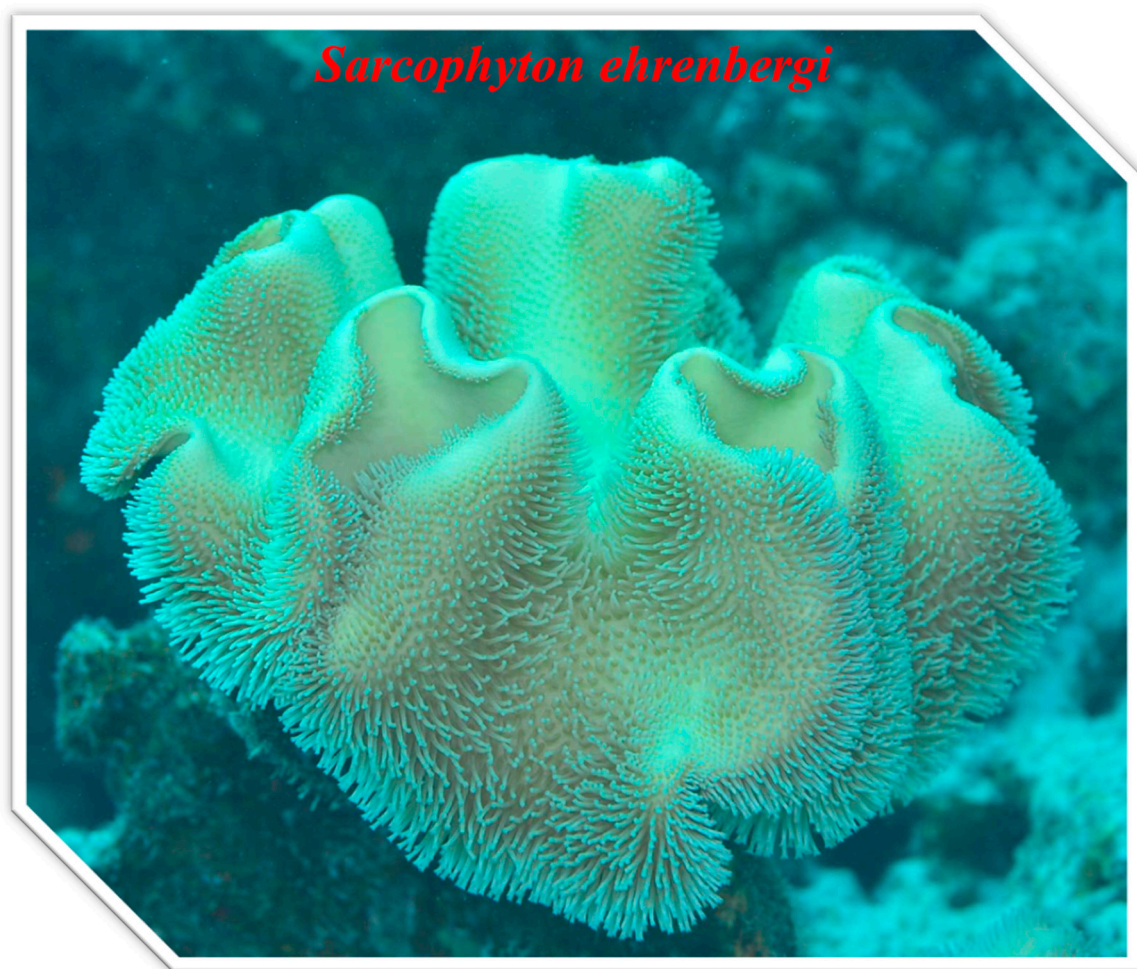

Figure S1. The South China Sea soft coral *Sarcophyton ehrenbergi*.

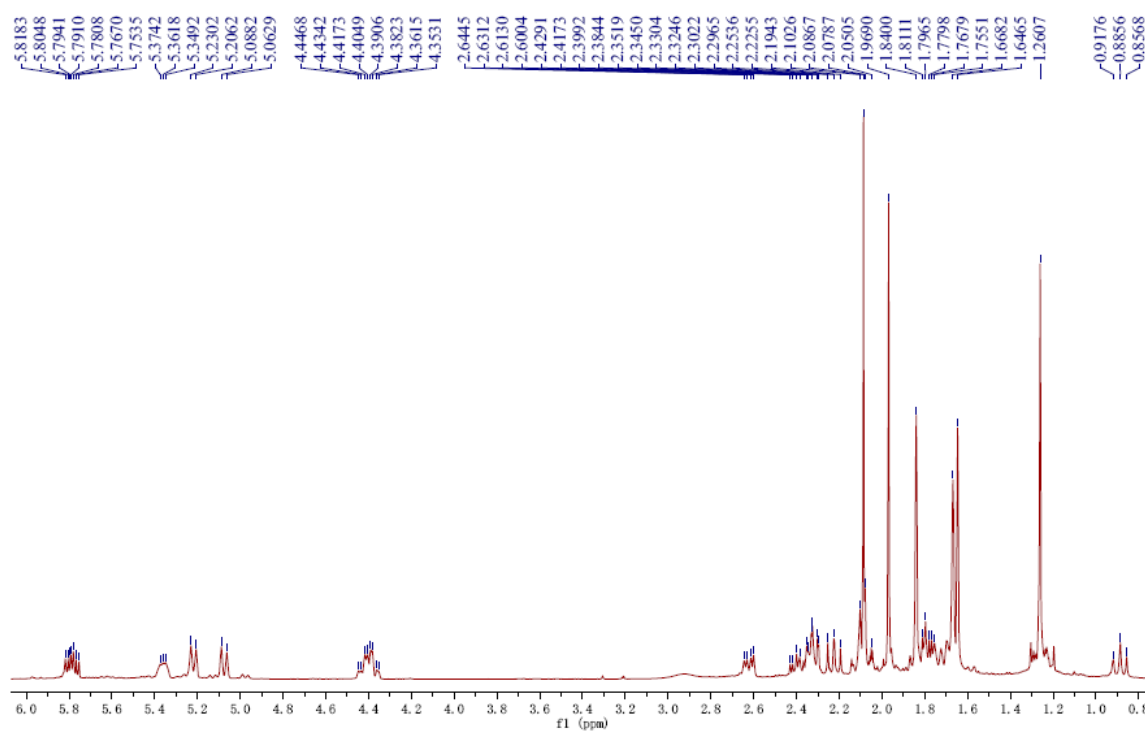

Figure S2.  $^1\text{H}$ -NMR spectrum of compound 1.

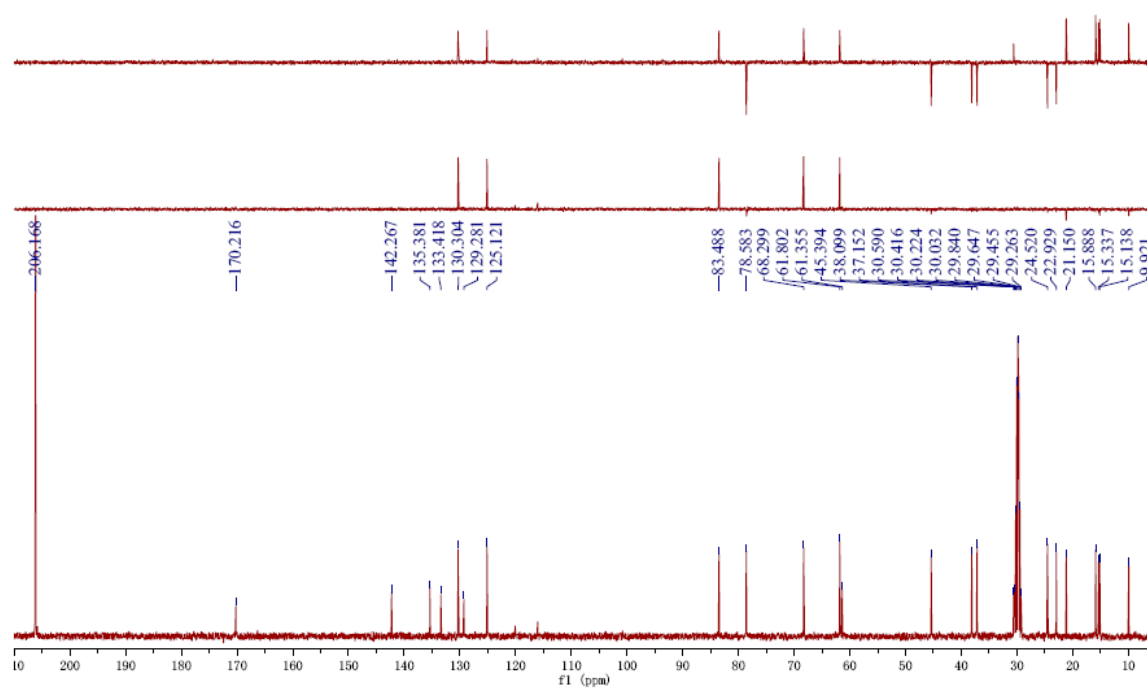

Figure S3. DEPT spectra of compound 1.

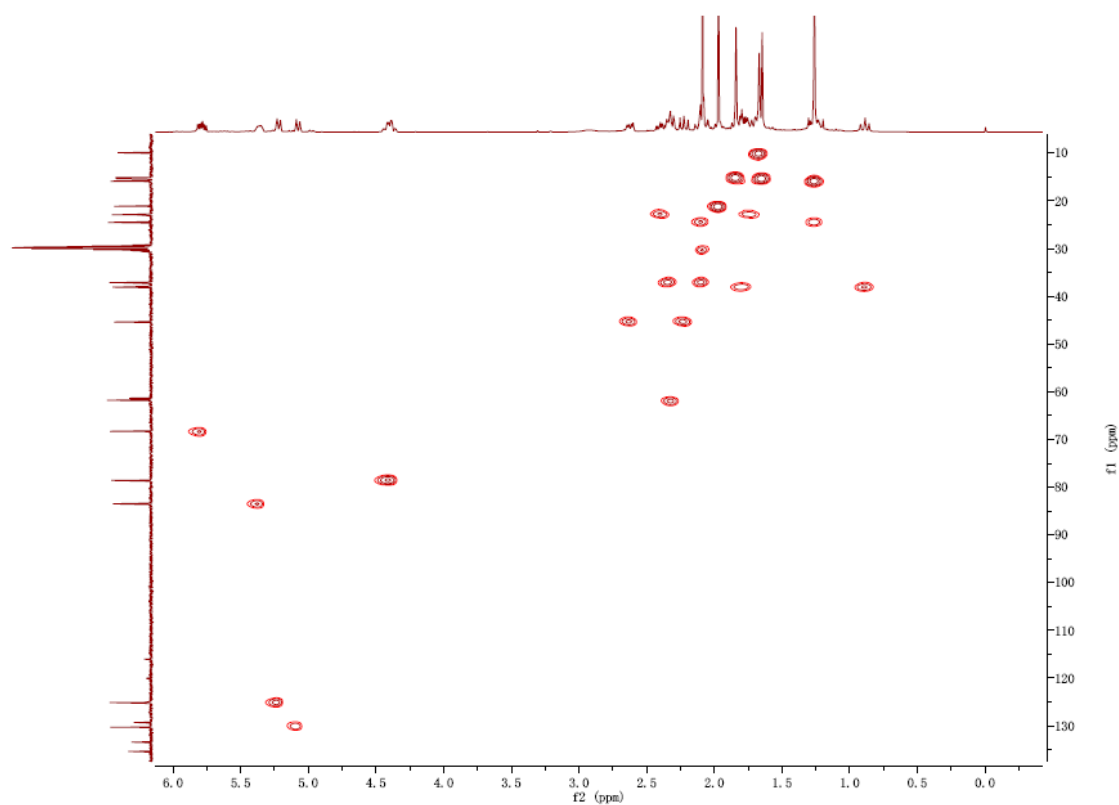

Figure S4. HSQC spectrum of compound 1.

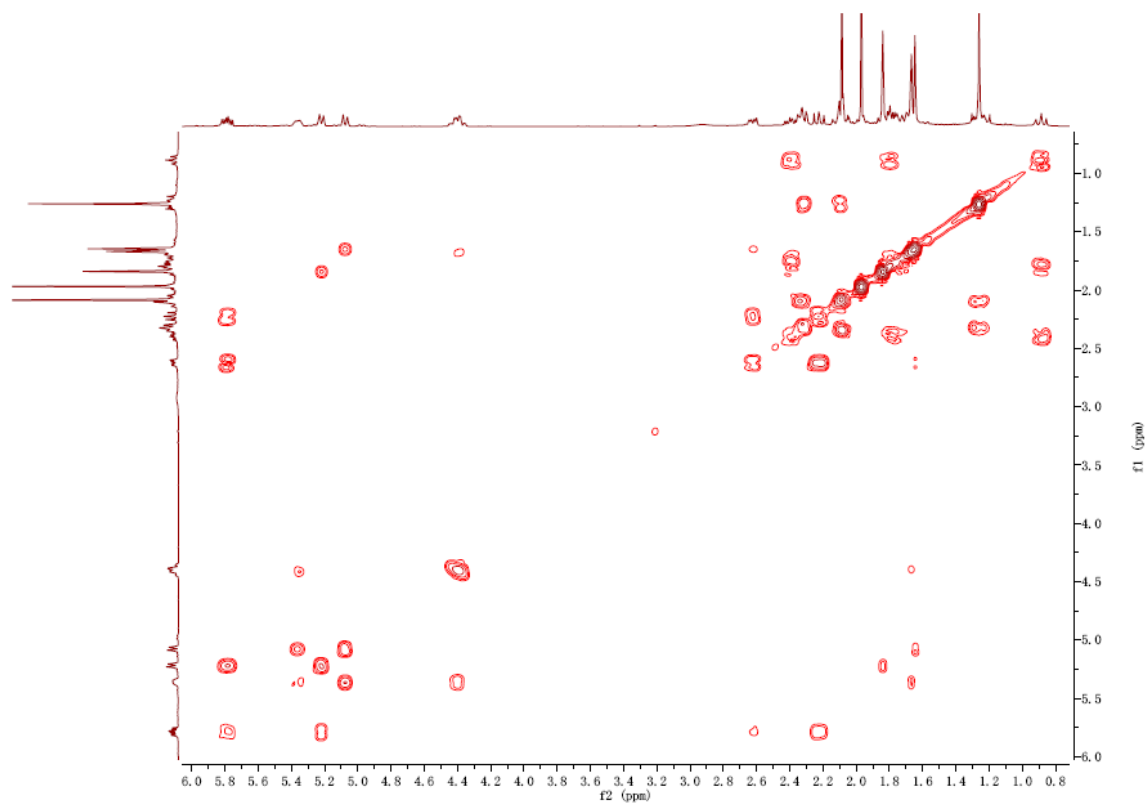

Figure S5.  $^1\text{H}$ - $^1\text{H}$  COSY spectrum of compound 1.

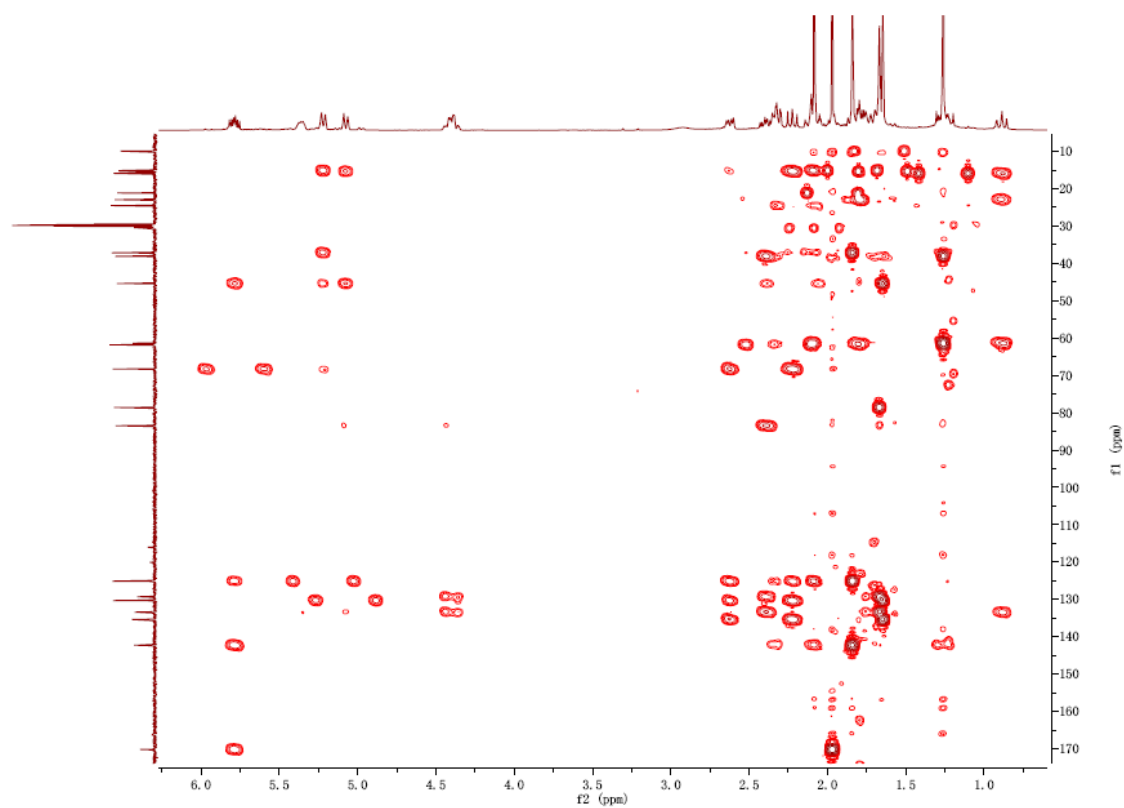

Figure S6. HMBC spectrum of compound 1.

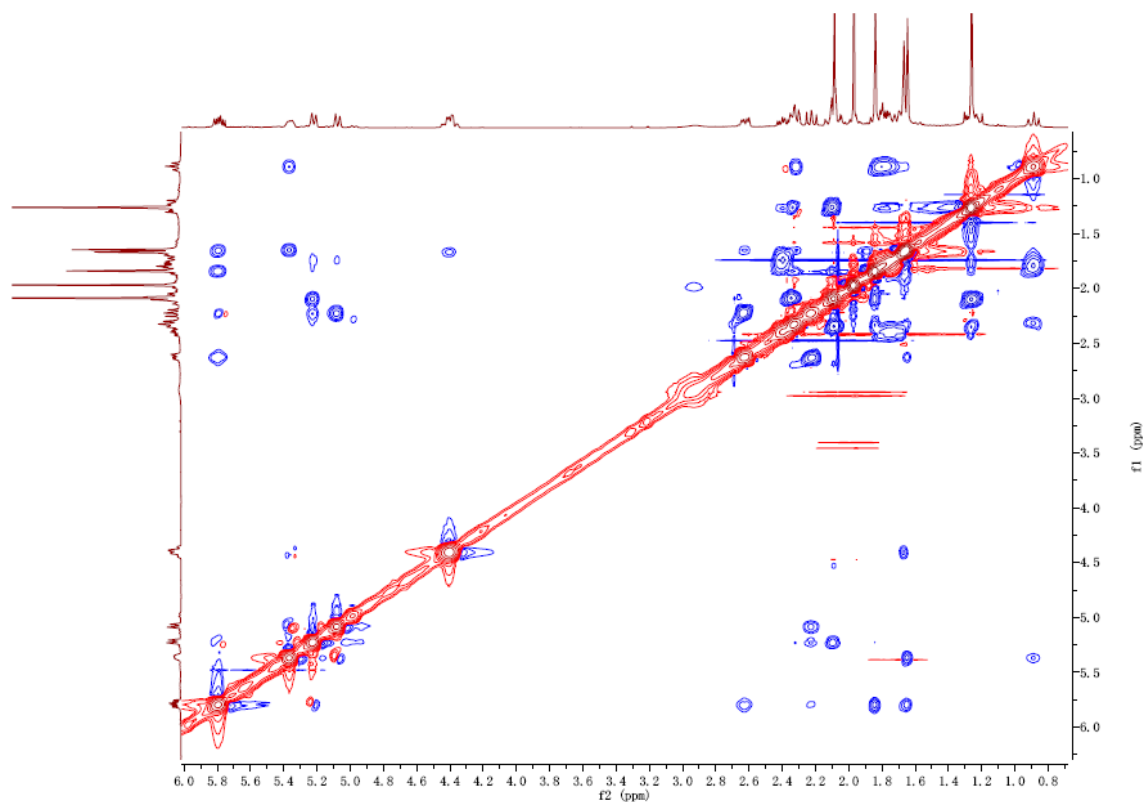

Figure S7. NOESY spectrum of compound 1.

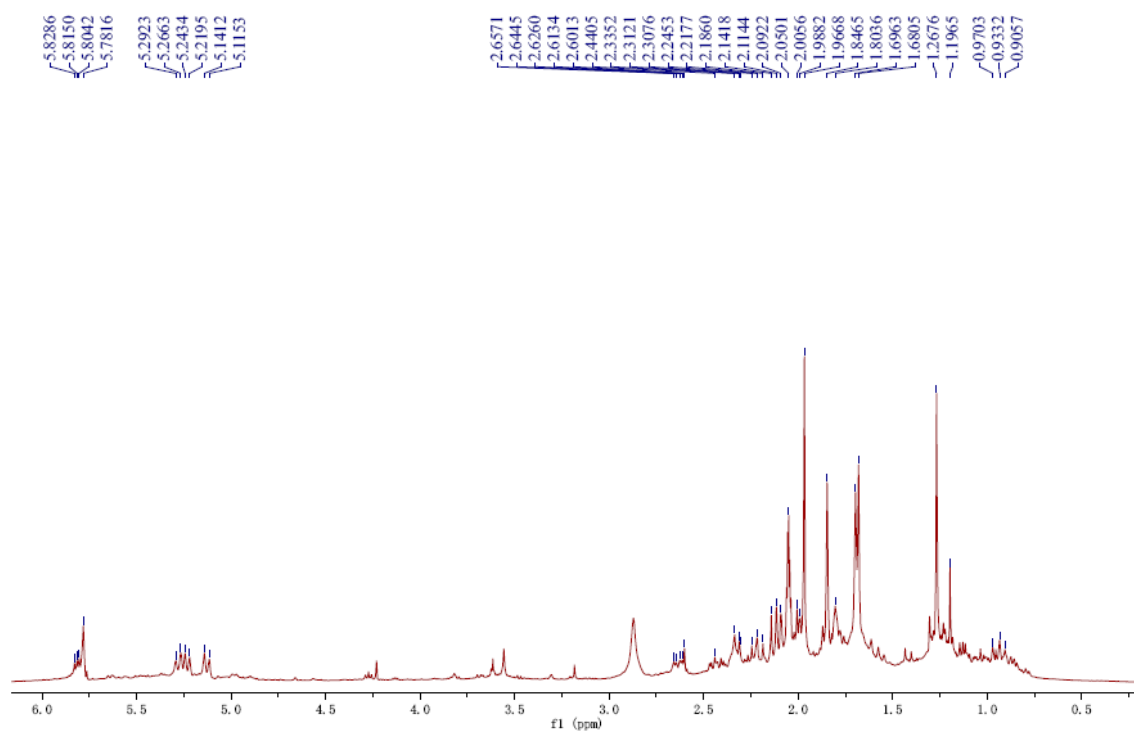

Figure S8. <sup>1</sup>H-NMR spectrum of compound 2.

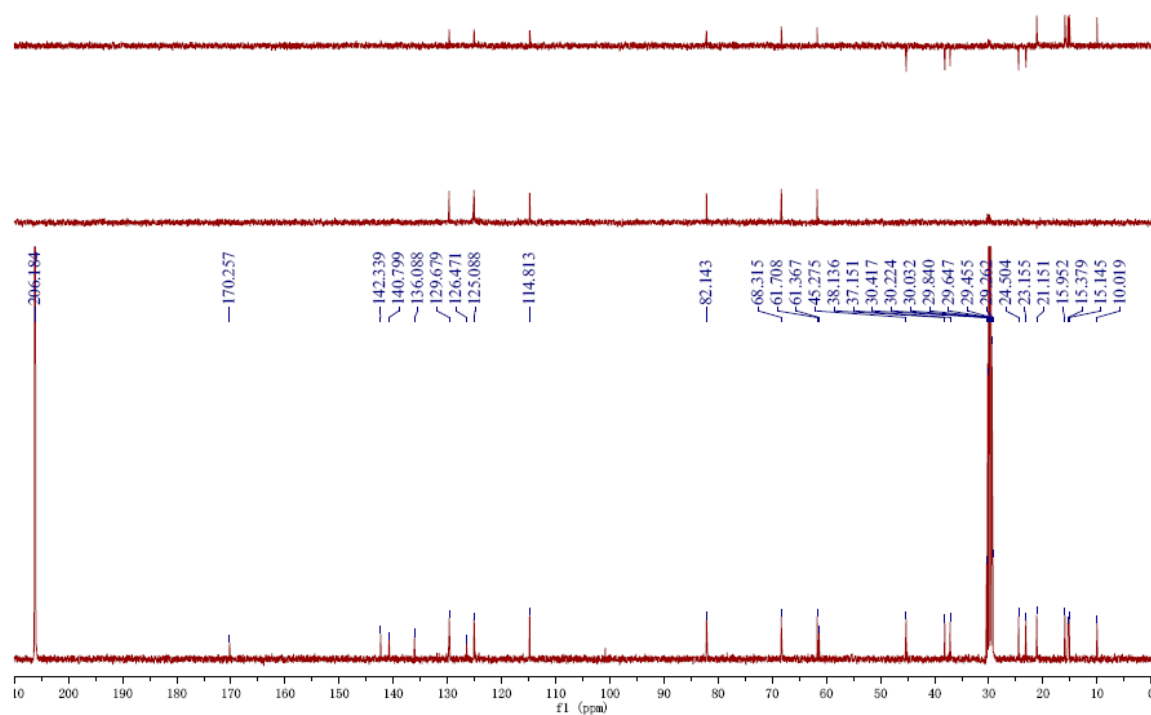

Figure S9. DEPT spectra of compound 2.

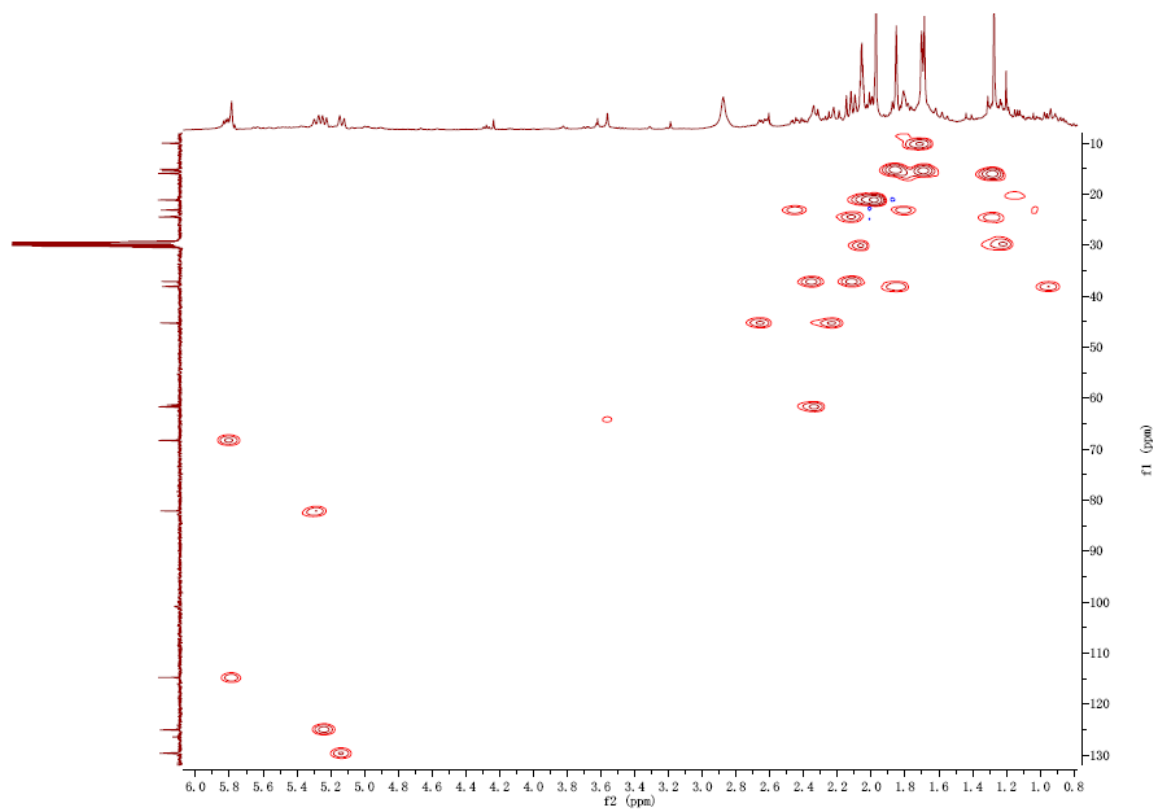

Figure S10. HSQC spectrum of compound 2.

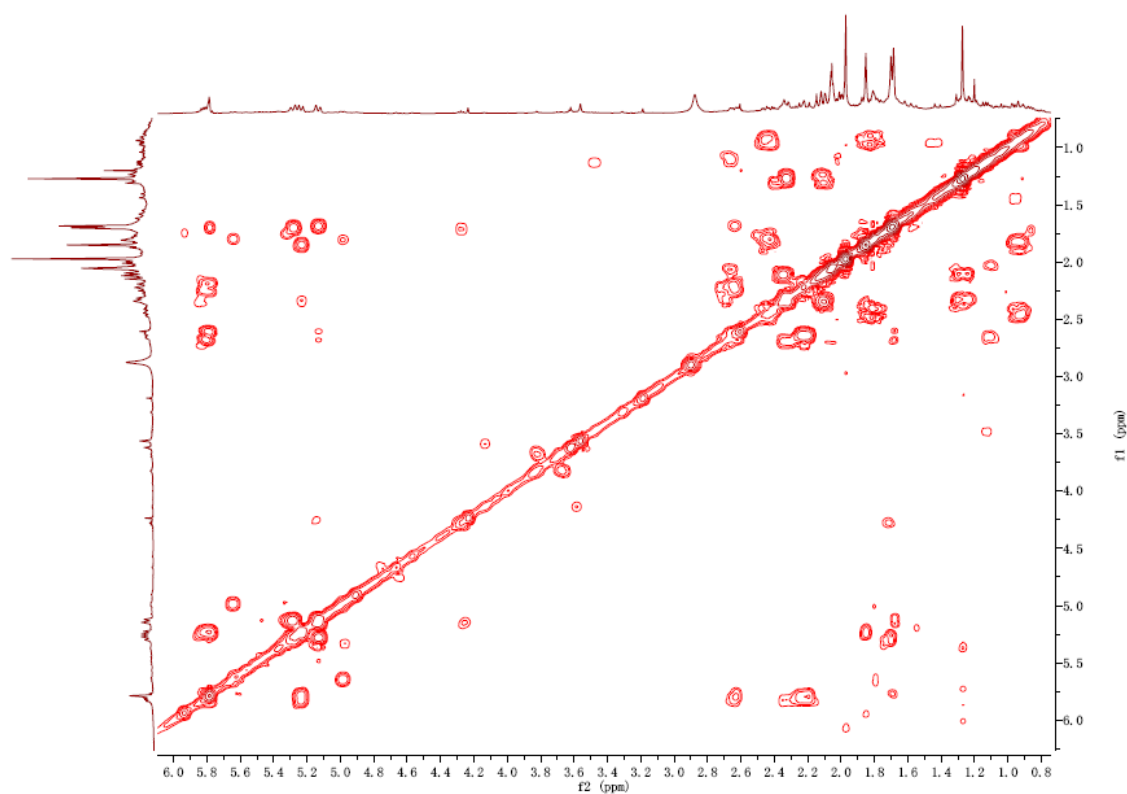

Figure S11.  $^1\text{H}$ - $^1\text{H}$  COSY spectrum of compound 2.

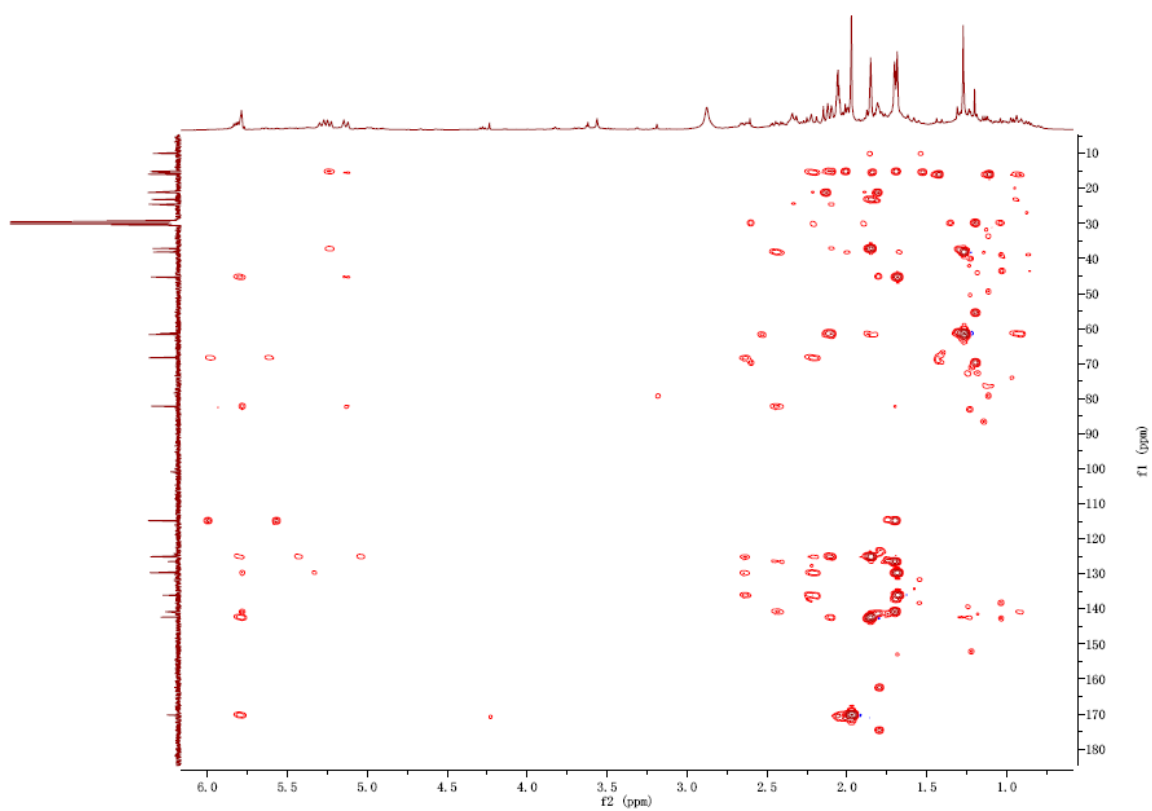

Figure S12. HMBC spectrum of compound 2.



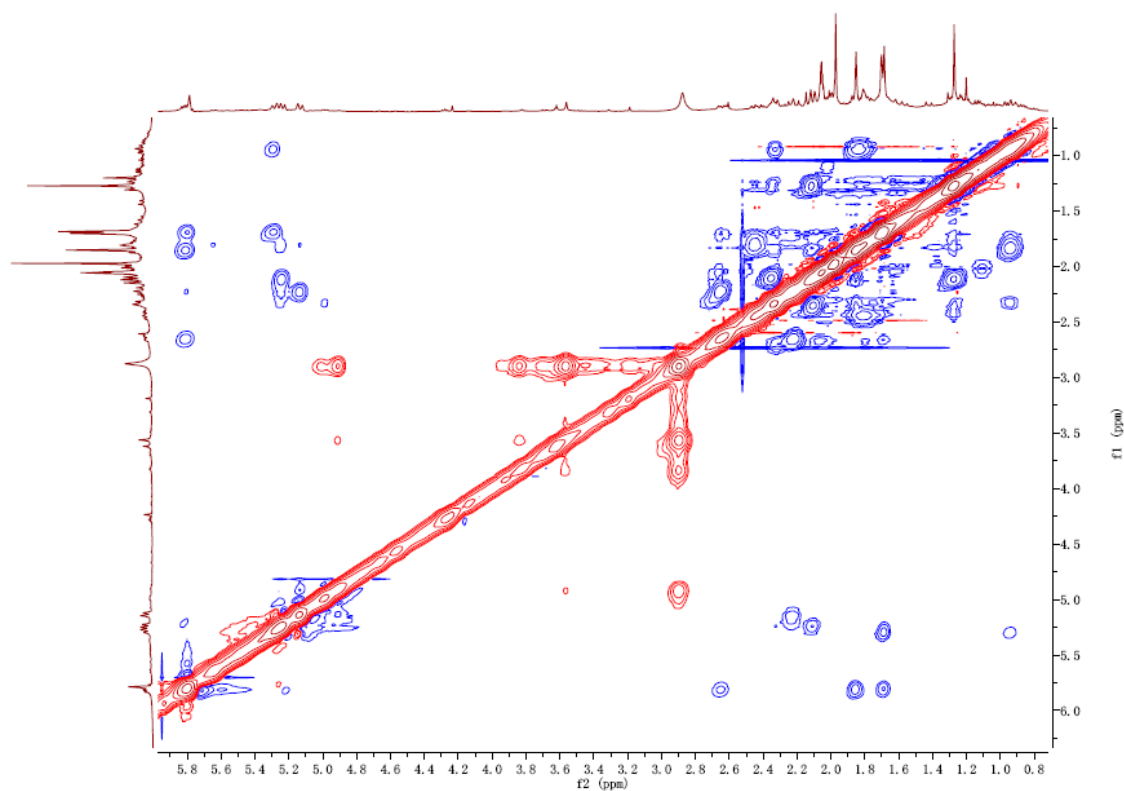

Figure S13. NOESY spectrum of compound 2.

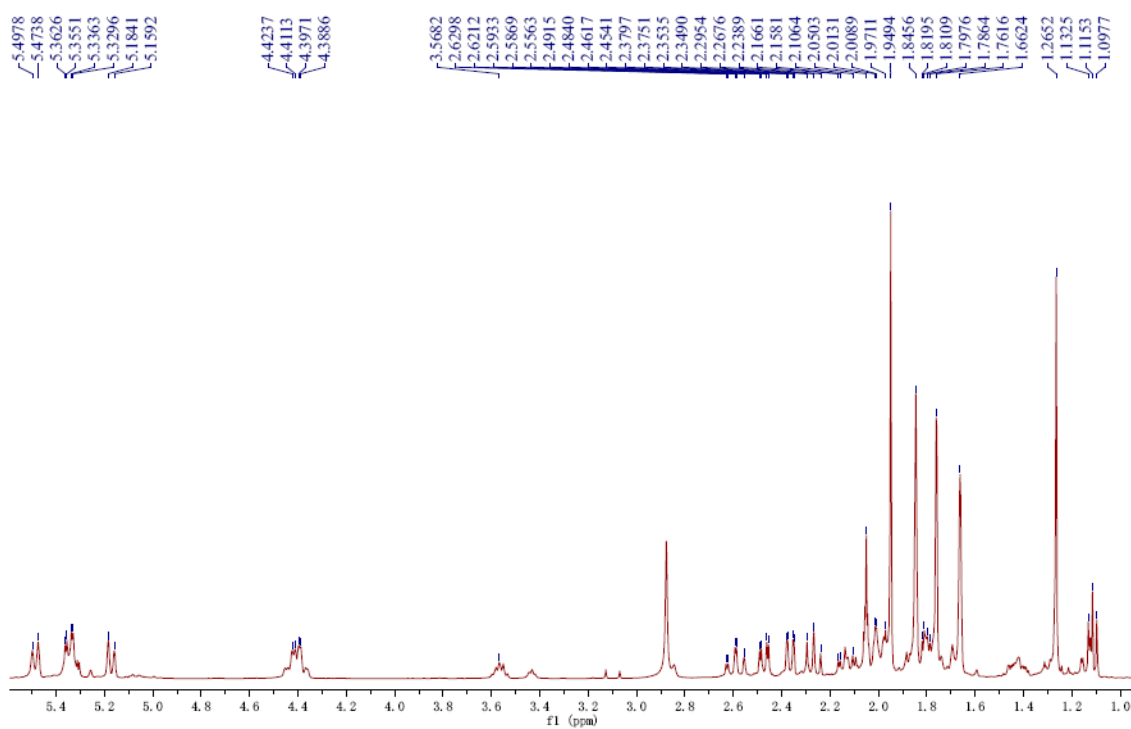

Figure S14. <sup>1</sup>H-NMR spectrum of compound 3.

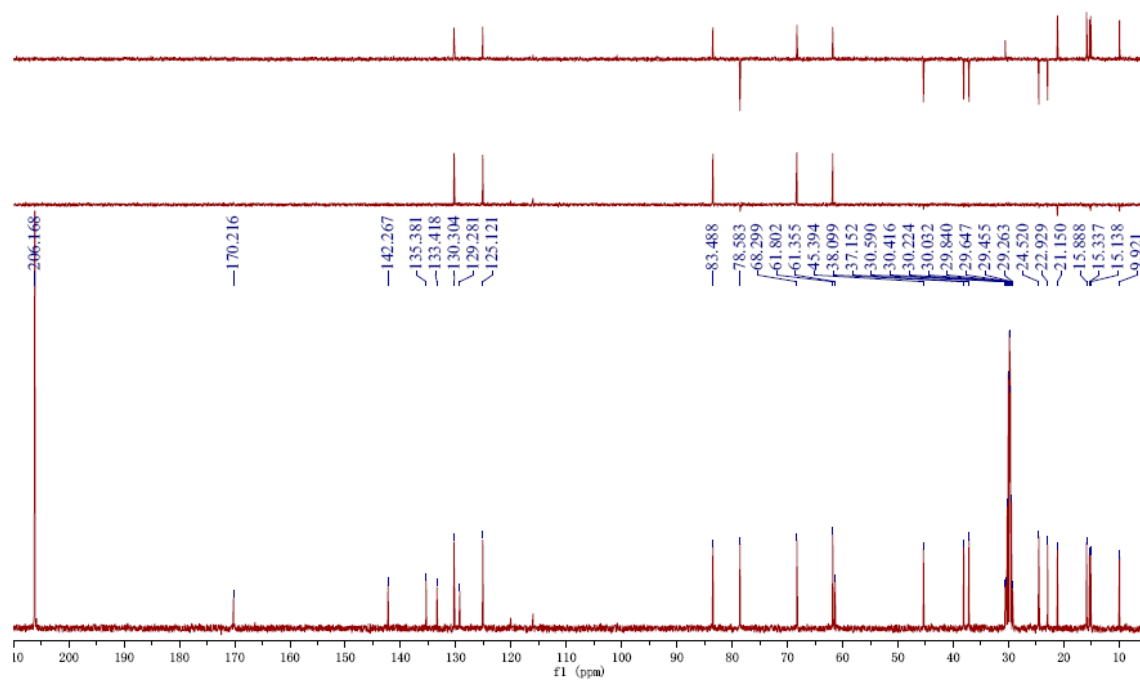

Figure S15. DEPT spectra of compound 3.

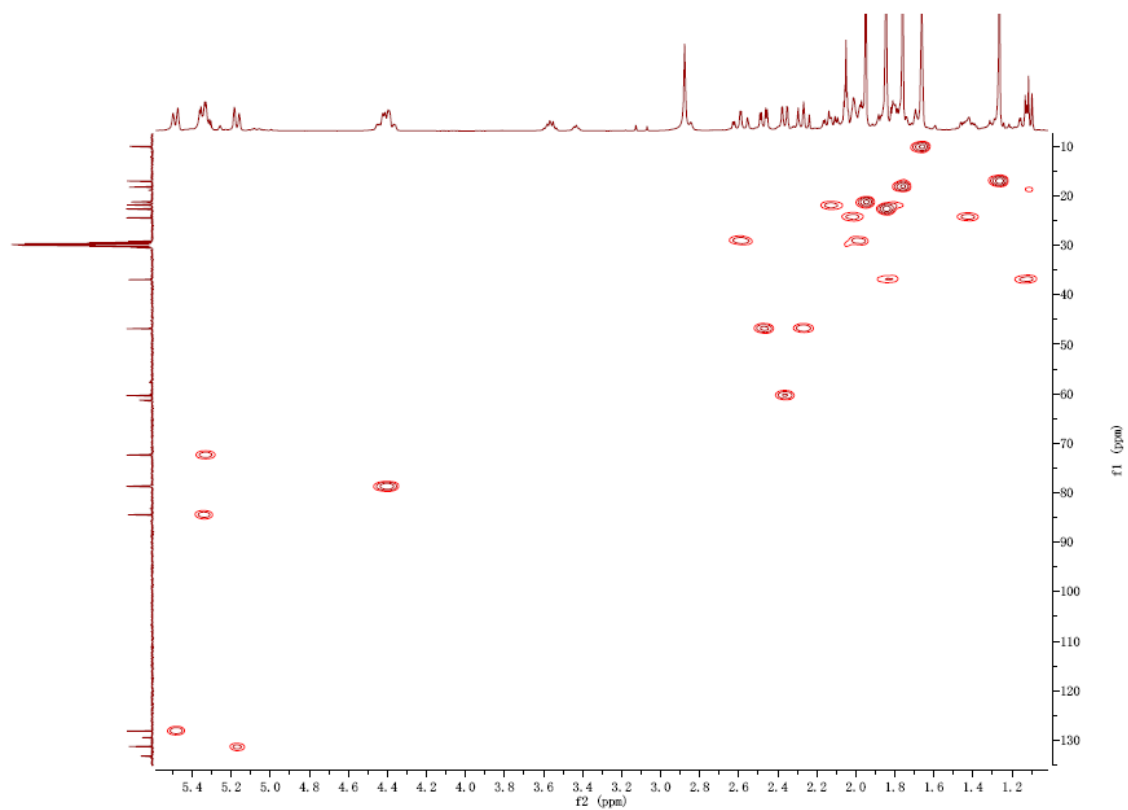

Figure S16. HSQC spectrum of compound 3.

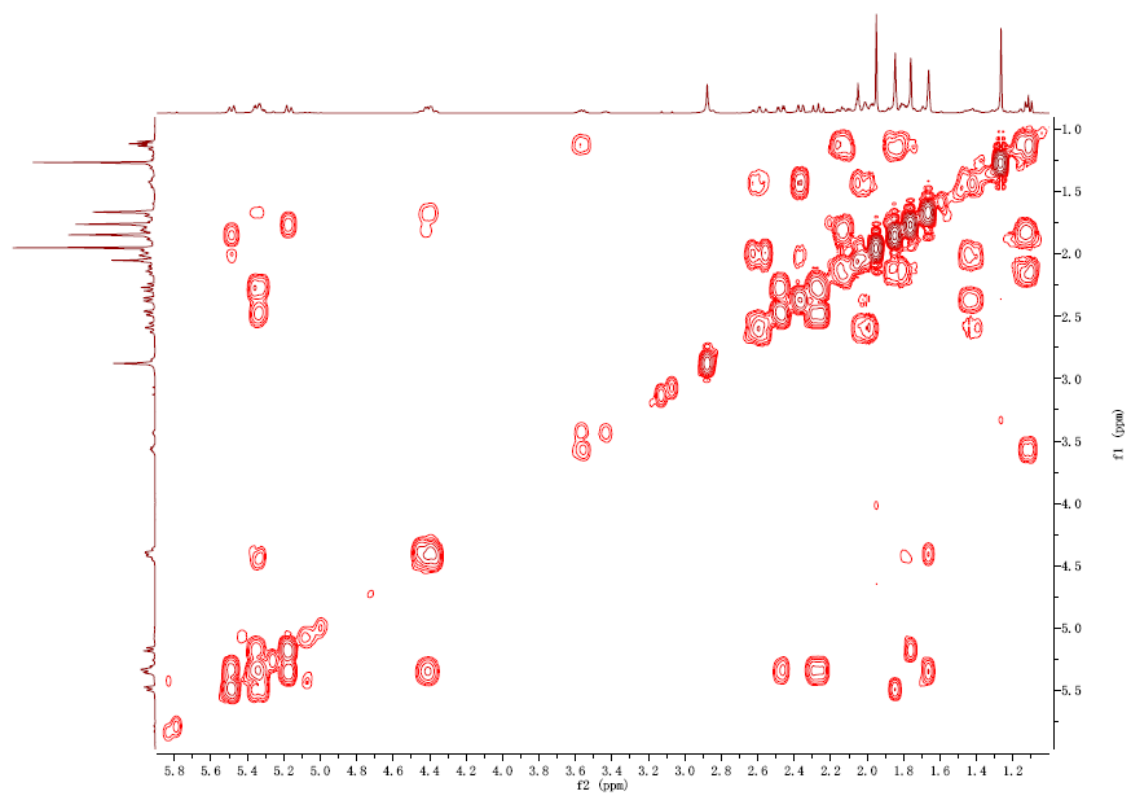

**Figure S17.**  $^1\text{H}$ - $^1\text{H}$  COSY spectrum of compound 3.

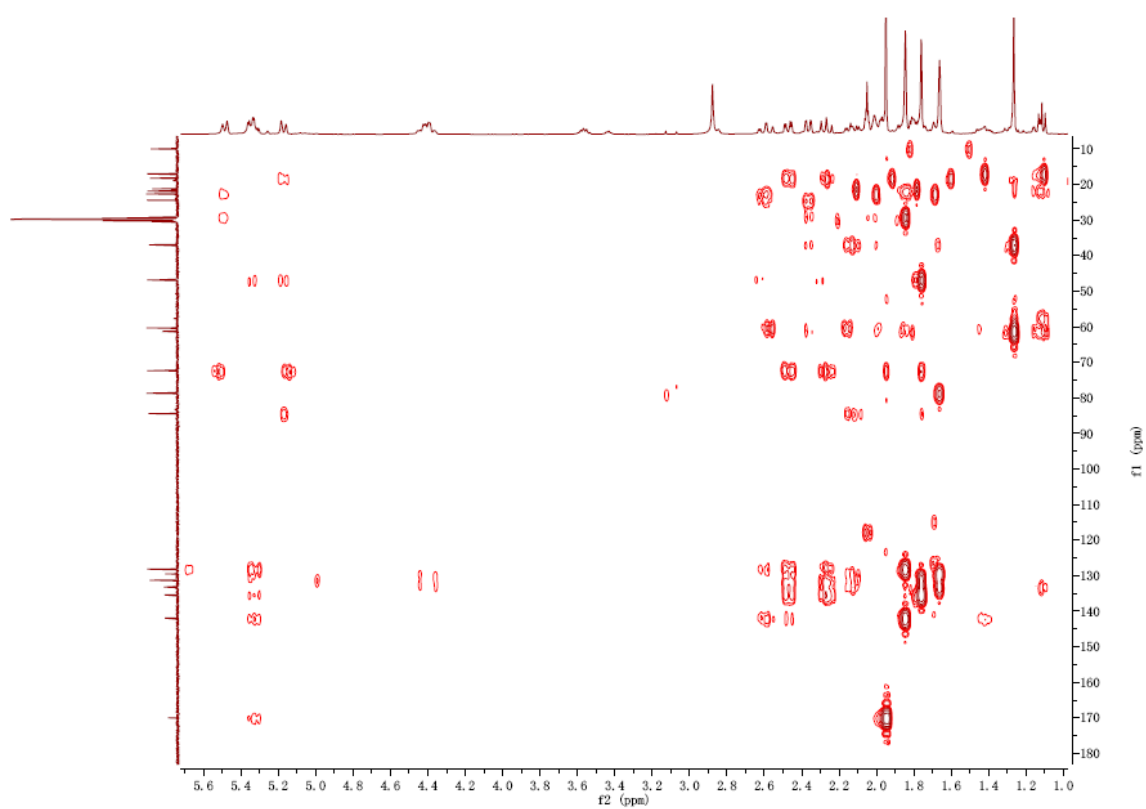

**Figure S18.** HMBC spectrum of compound 3.

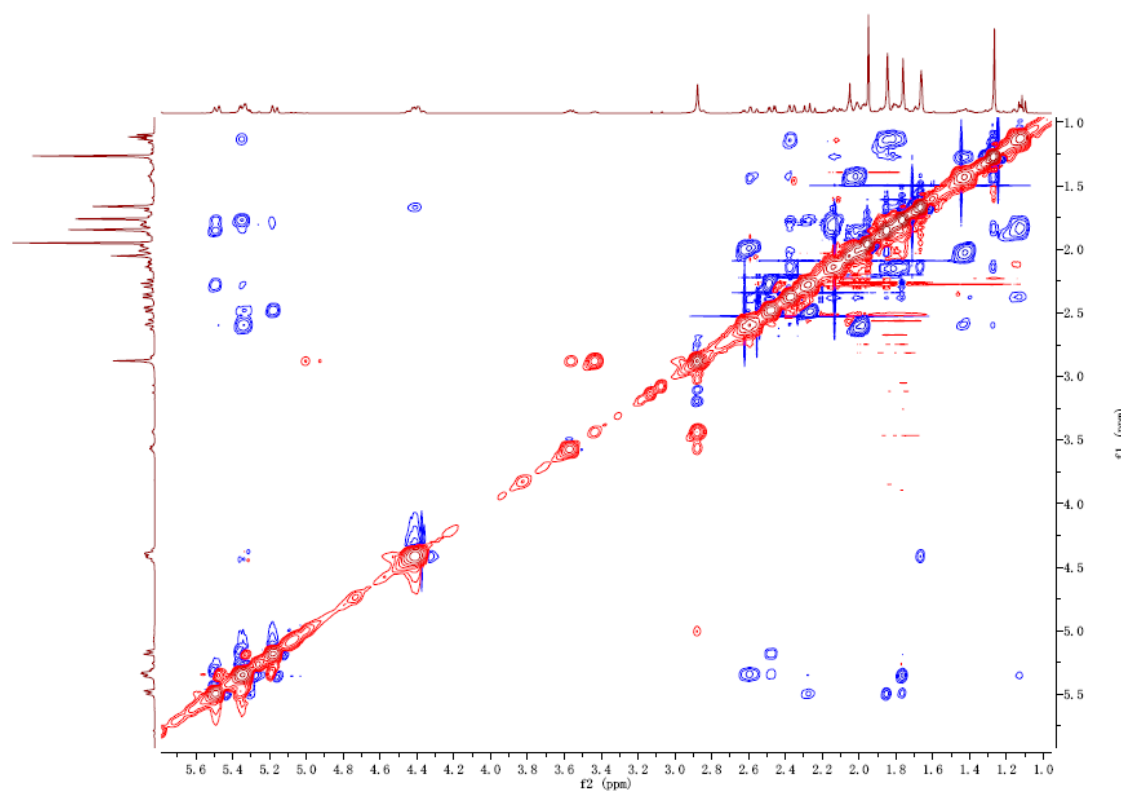

Figure S19. NOESY spectrum of compound 3.

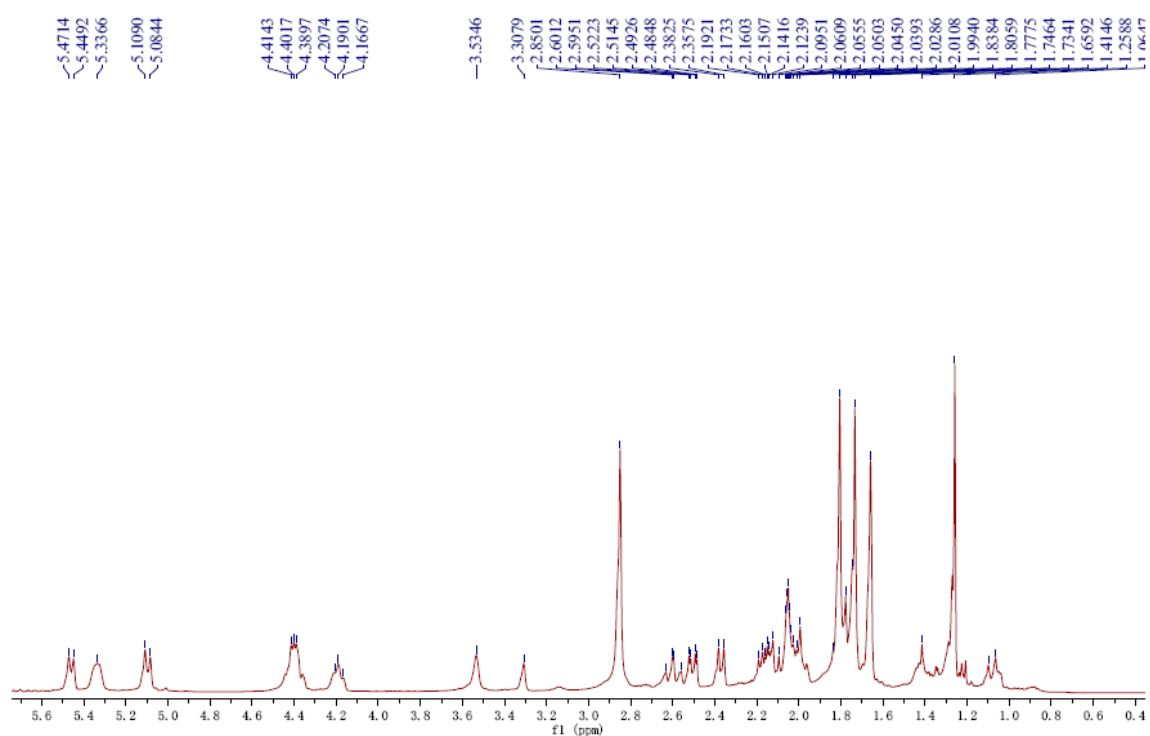Figure S20.  $^1\text{H}$ -NMR spectrum of compound 4.

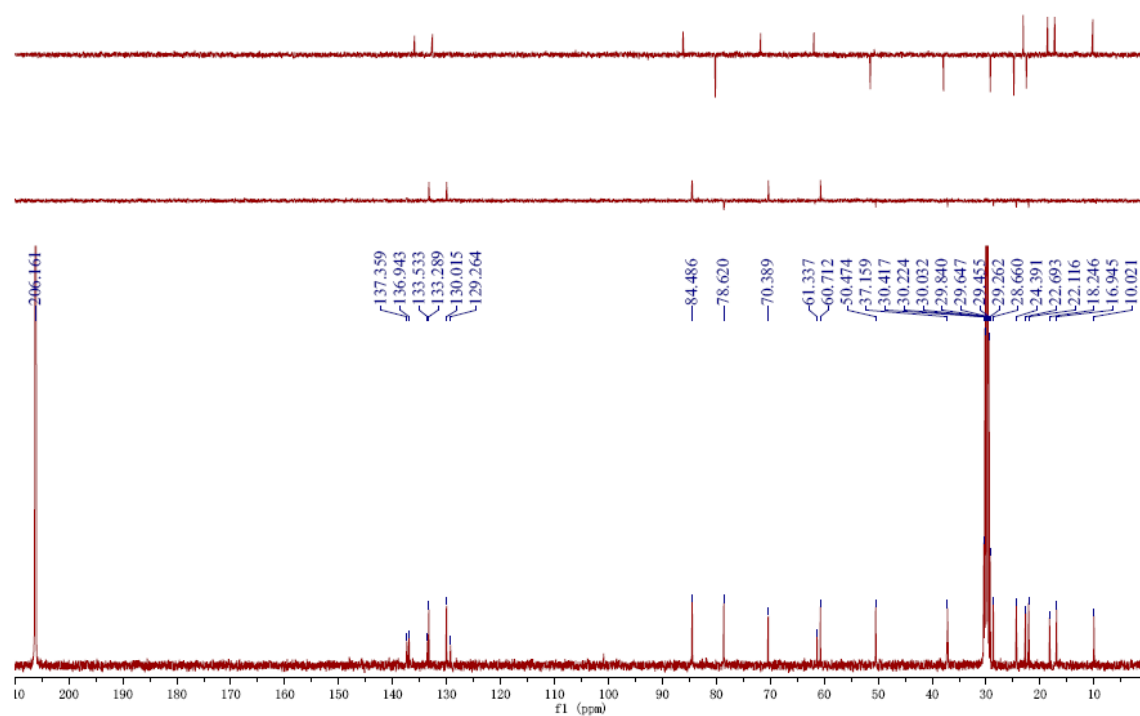

Figure S21. DEPT spectra of compound 4.

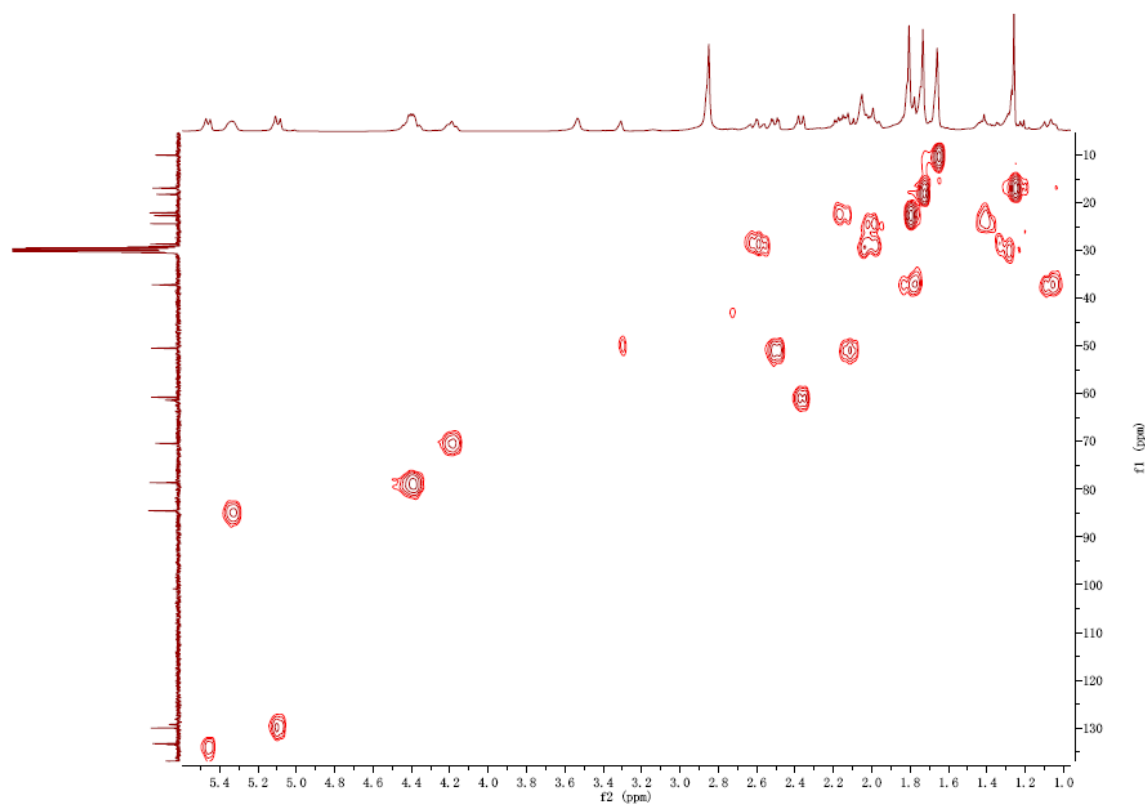

Figure S22. HSQC spectrum of compound 4.

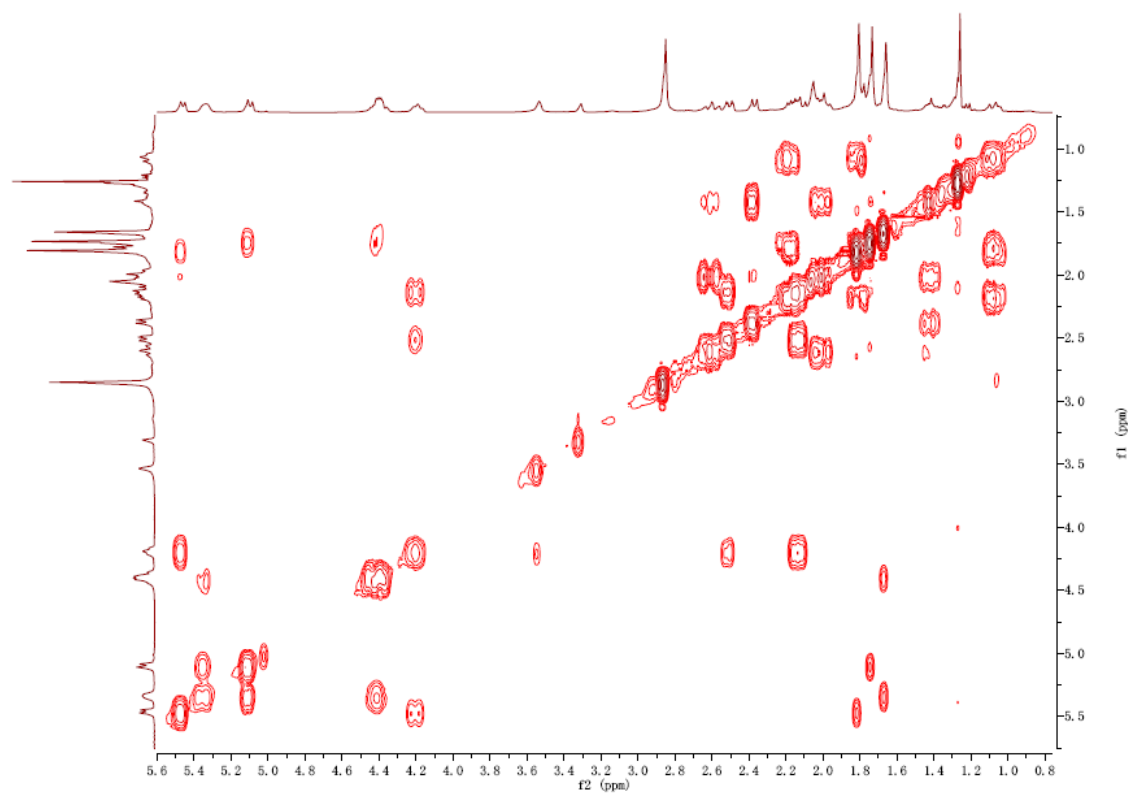

Figure S23.  $^1\text{H}$ - $^1\text{H}$  COSY spectrum of compound 4.

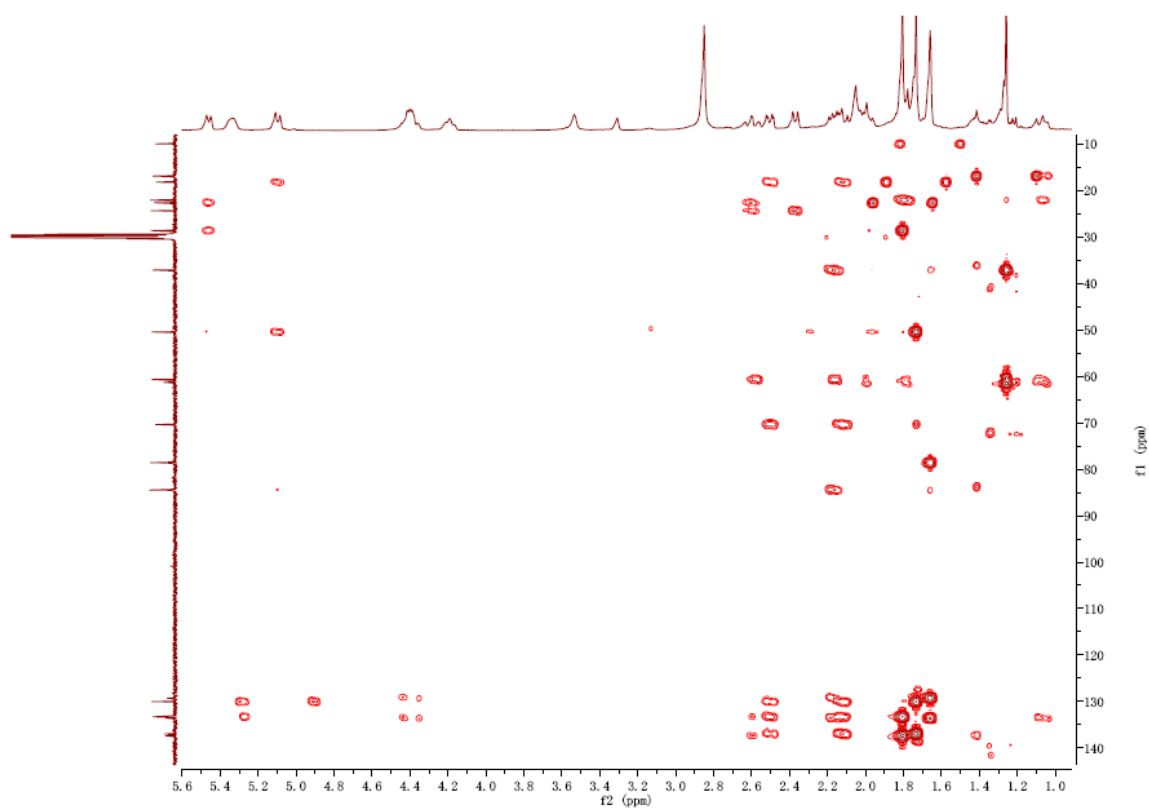

Figure S24. HMBC spectrum of compound 4.

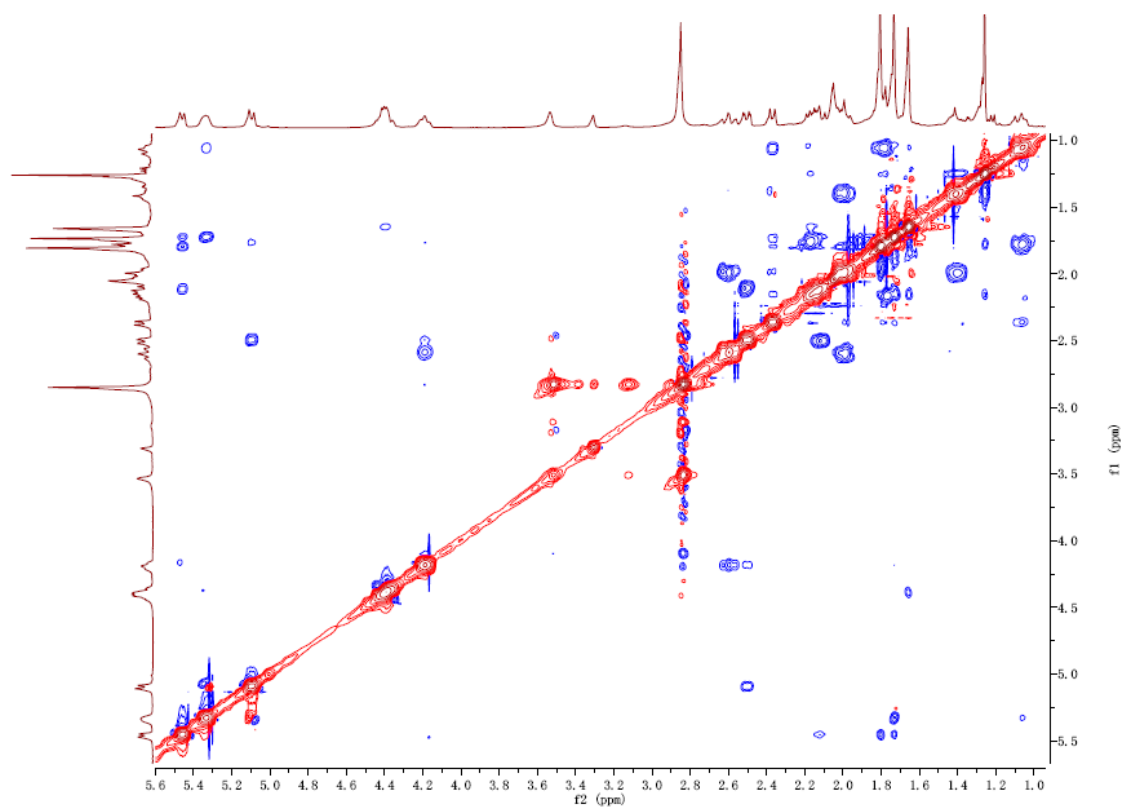

Figure S25. NOESY spectrum of compound 4.

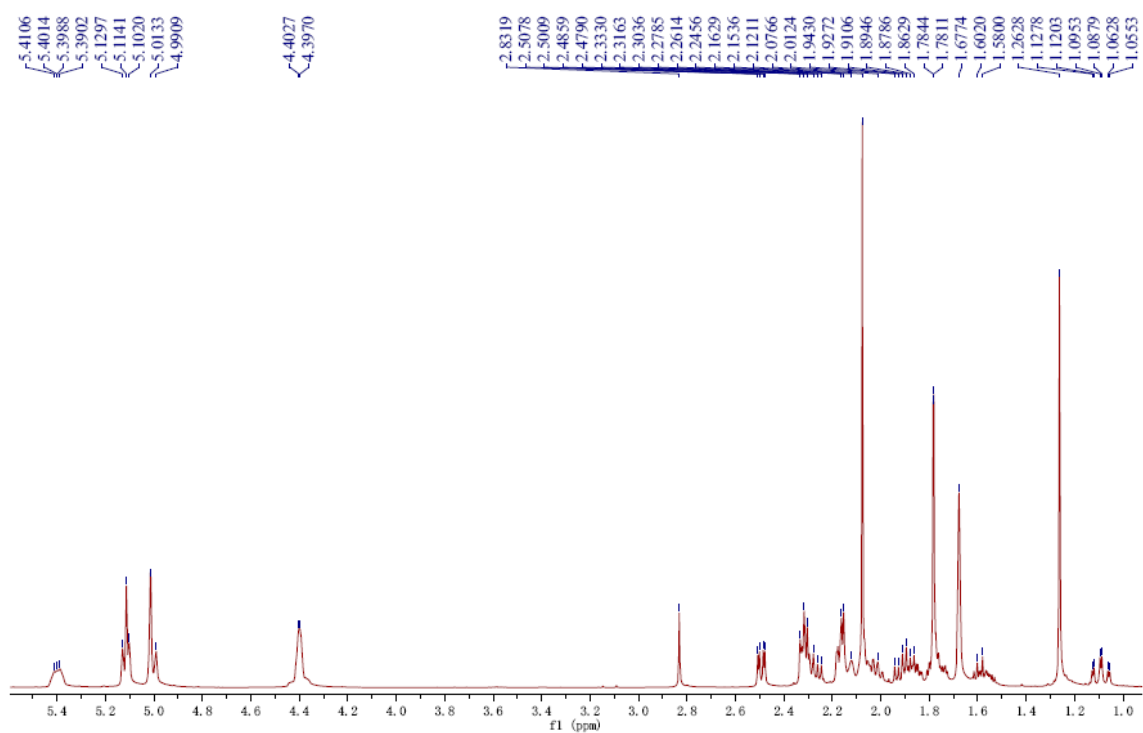

Figure S26. <sup>1</sup>H-NMR spectrum of compound 5.

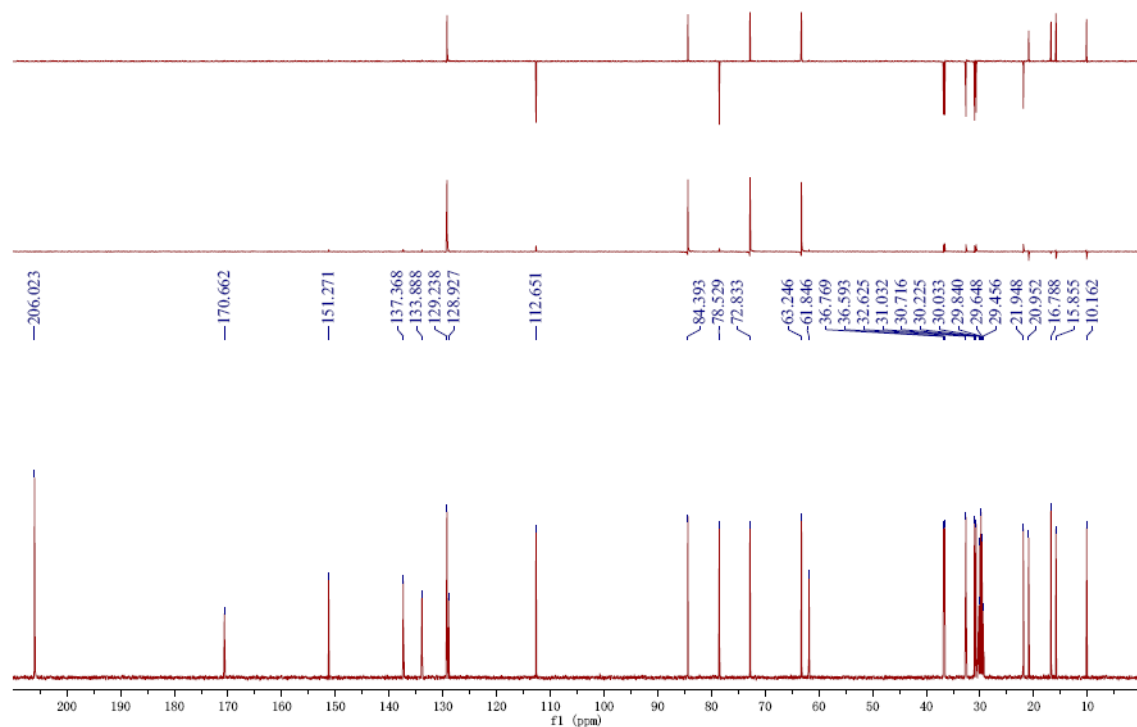

Figure S27. DEPT spectra of compound 5.

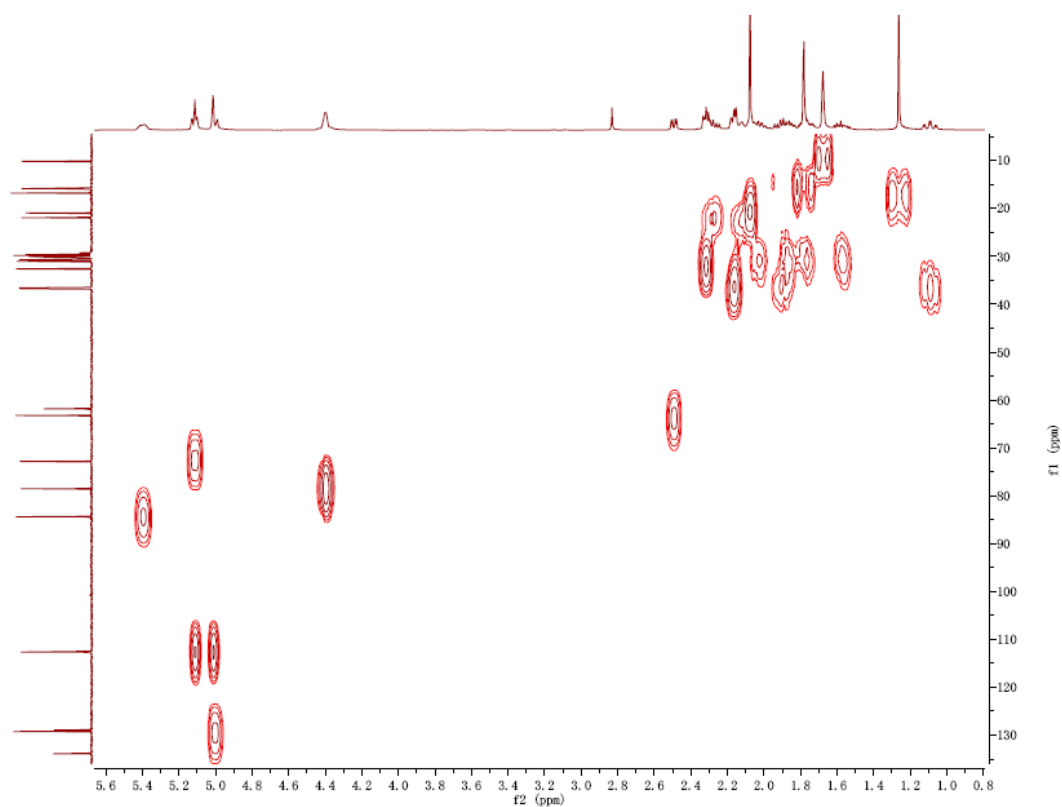

Figure S28. HSQC spectrum of compound 5.



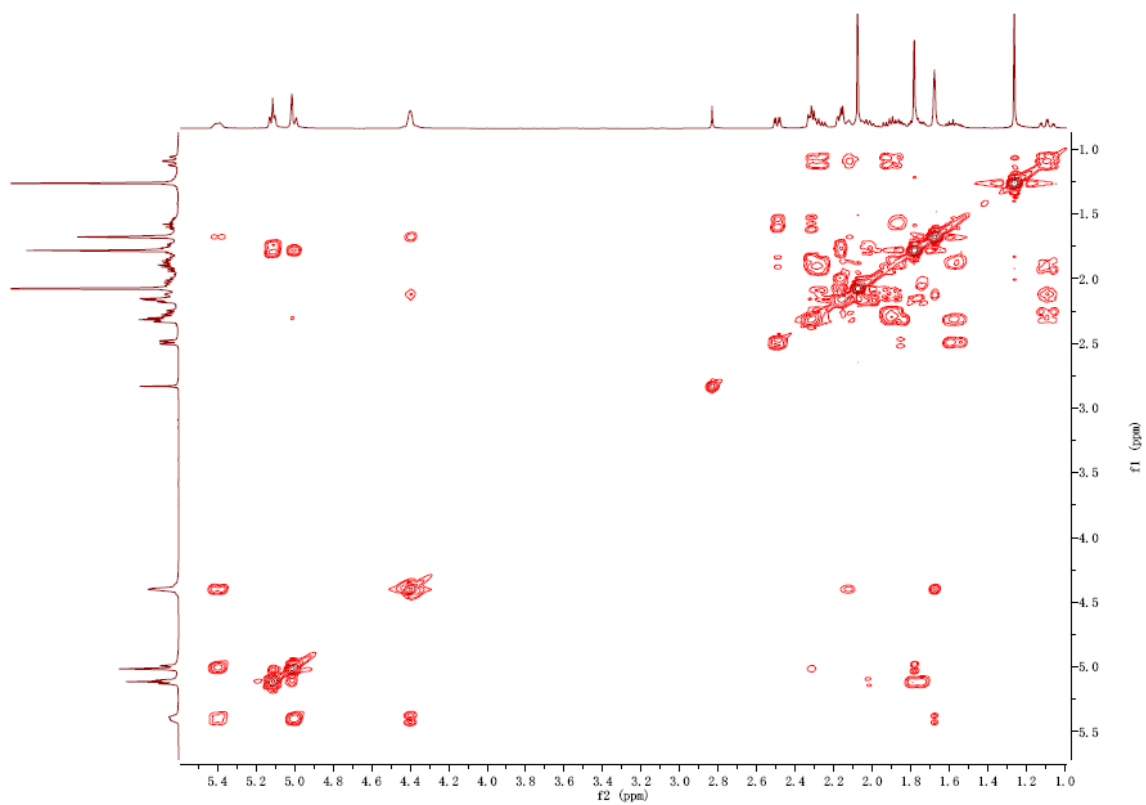

Figure S29.  $^1\text{H}$ - $^1\text{H}$  COSY spectrum of compound 5.

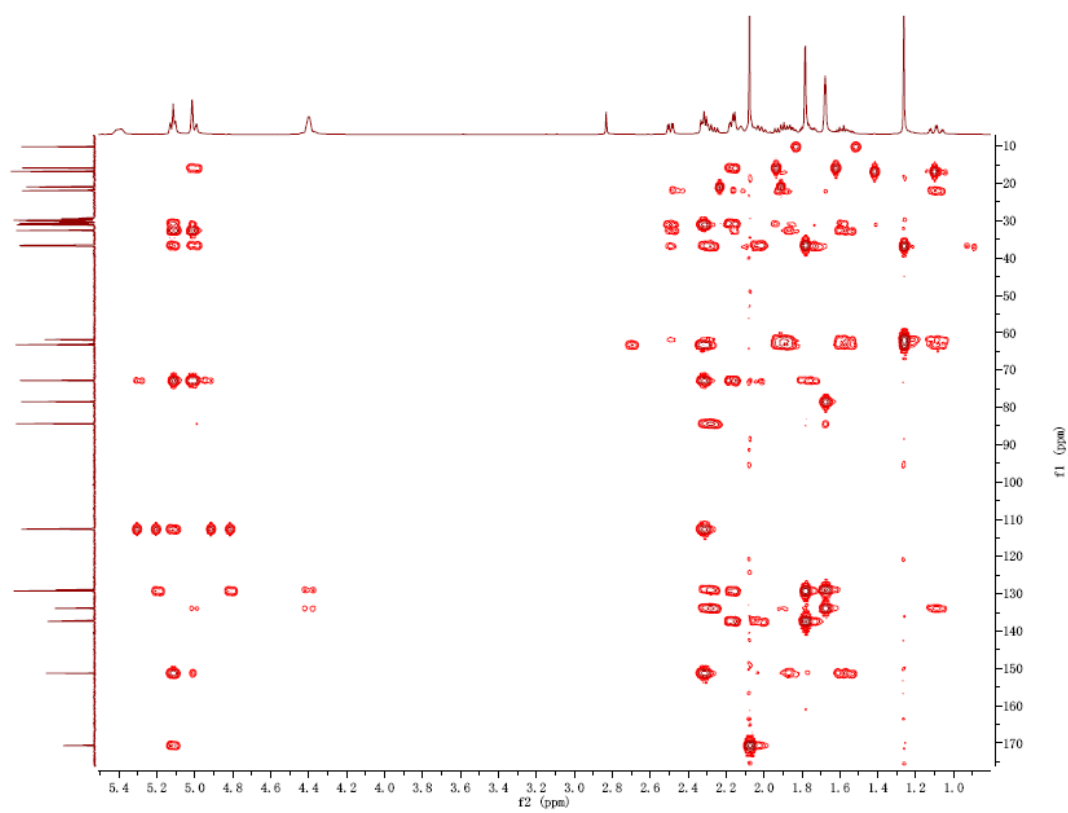

Figure S30. HMBC spectrum of compound 5.

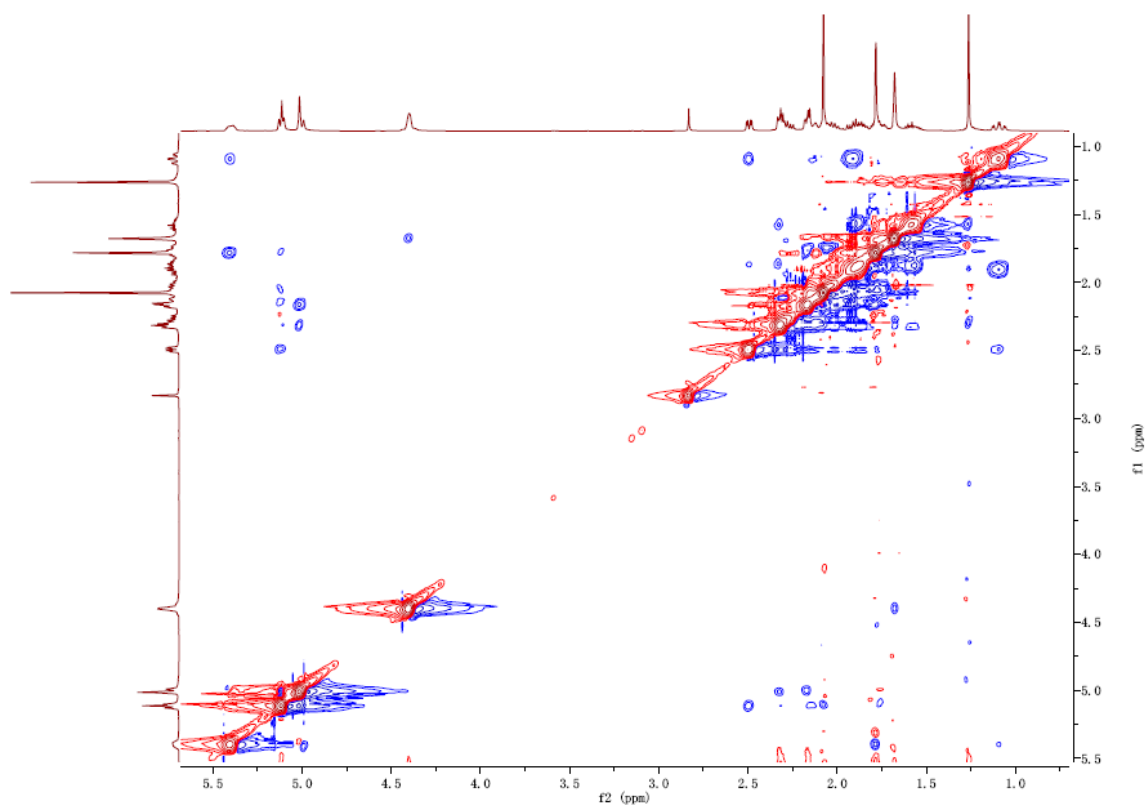

Figure S31. NOESY spectrum of compound 5.

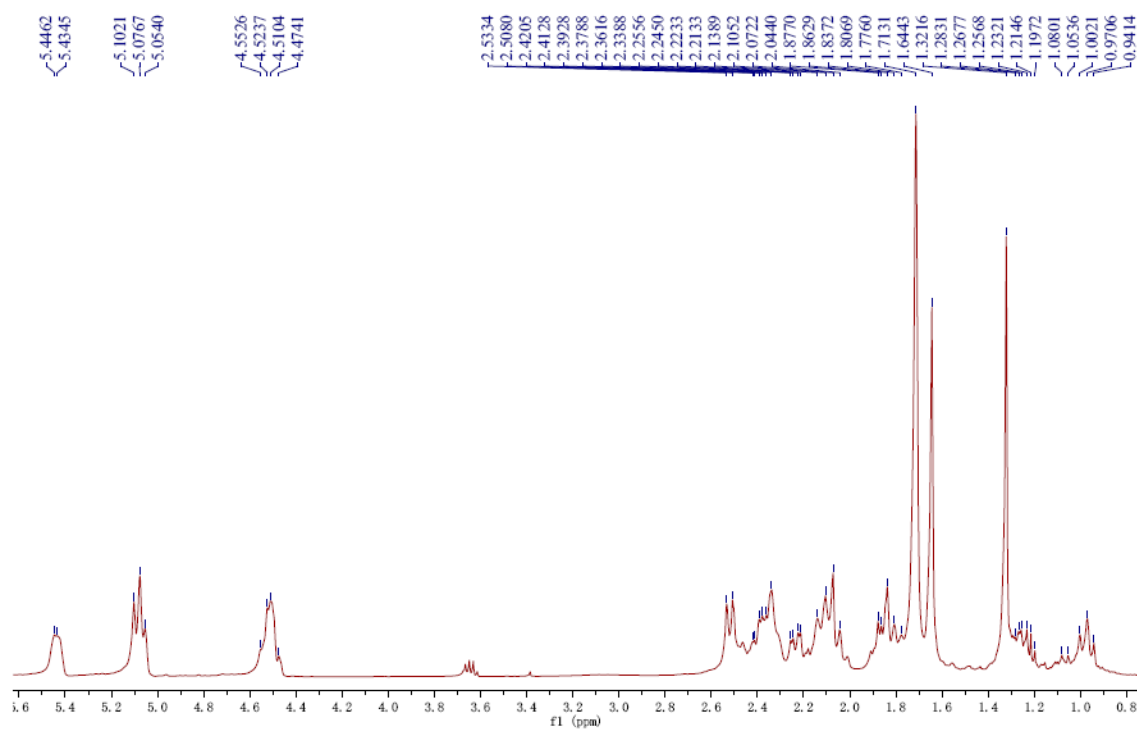Figure S32.  $^1\text{H}$ -NMR spectrum of compound 6.

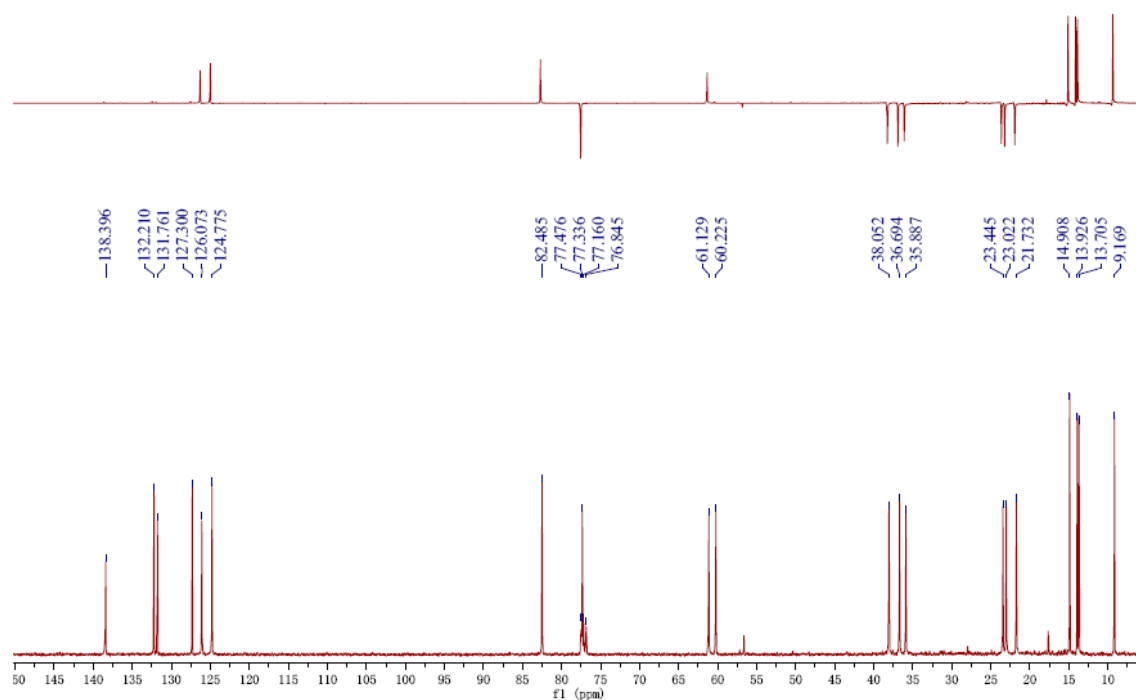

Figure S33. DEPT spectra of compound 6.

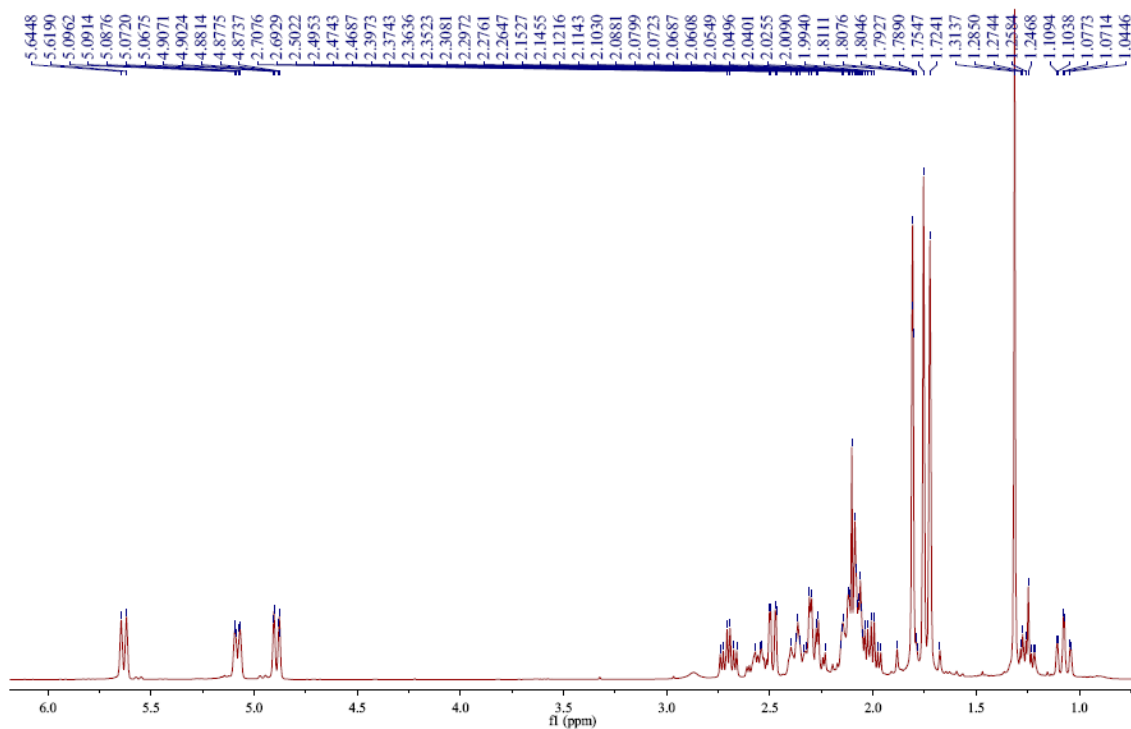Figure S34. <sup>1</sup>H-NMR spectrum of compound 7.

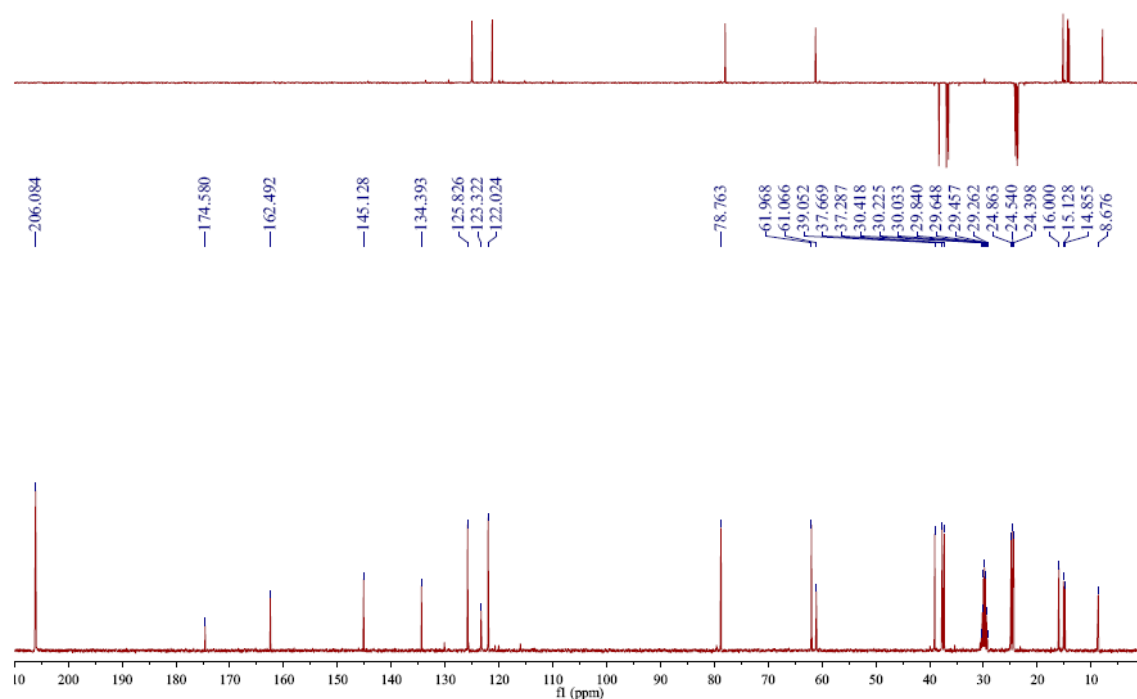

Figure S35. DEPT spectra of compound 7.

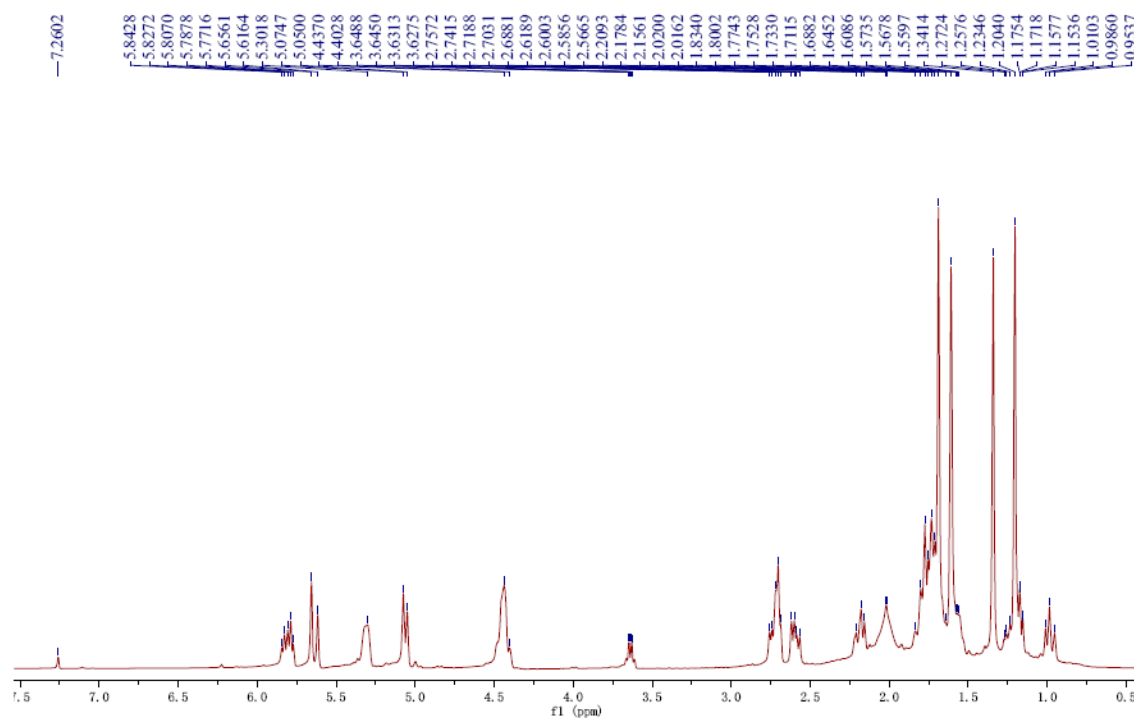Figure S36. <sup>1</sup>H-NMR spectrum of compound 8.

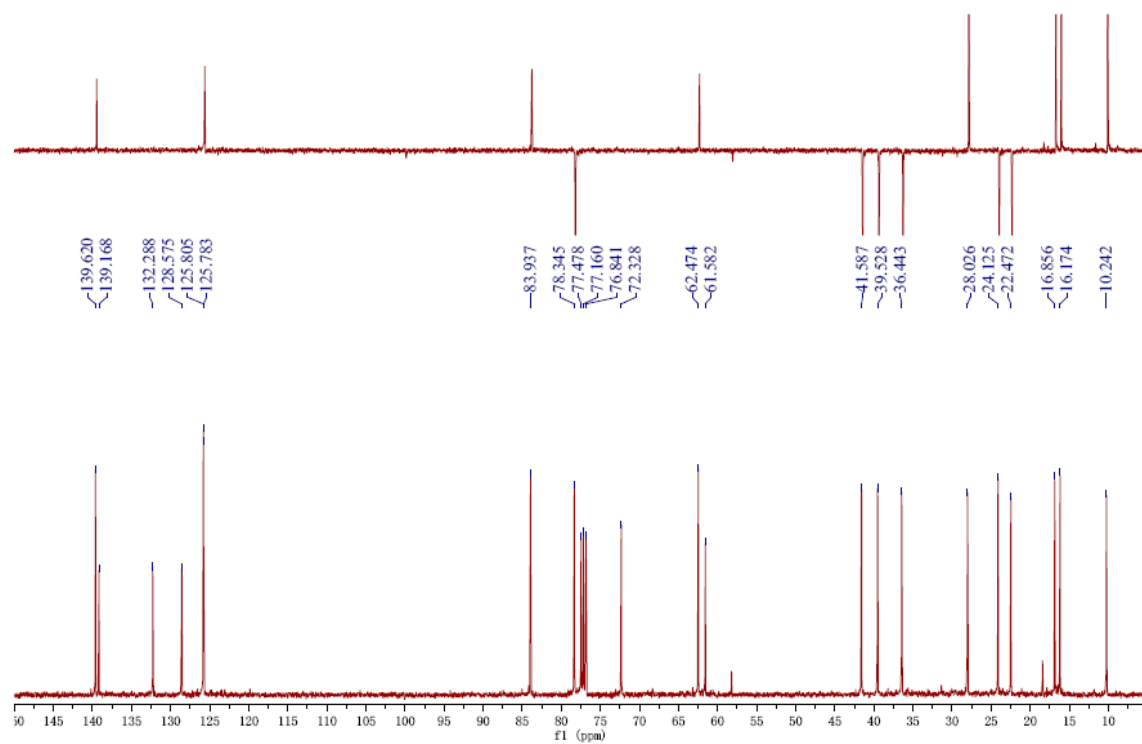

Figure S37. DEPT spectra of compound 8.
